# Supplementary material for: Lypd6b promotes colon tumorigenesis by inhibiting CD8+ T cell-mediated anti-tumor immunity through metabolic reprogramming
Source: Research Square preprint supplement (doi:10.21203/rs.3.rs-5050970/v1), 2024-09-22
Supplement: Supplementary file 1 [file c65e137b695e96ea6e8676e3.xlsx]

## Sheet: Sheet1
REAGENT Or RESOURCE	SOURCE	IDENTIFIER
Materials
DMEM	BI	06-1055-57-1ACS-1
RMPI-1640	Hyclone	SH30809.01
FBS	Gibco	A31608-02
Pen-Strep Solution	BI	03-031-1B
AOM	Sigma-Aldrich	A5486
DSS	MP Biomedicals	160110
FastKing RT Kit (With gDNase)	TIANGEN	KR116
Fixation & Permeabilization Buffer	Invitrogen	88-8824-00
PMA/Ionomycin Mixt.	MultiSciences	CS1001
BFA/Monensin Mixt.	MultiSciences	CS1002
Mouse CD8 T Cell Isolation Kit	BioLegend	480008
IFN-γ ELISA kit	Cloud-Clone	SEA049Mu
IL-2 ELISA kit	Cloud-Clone	SEA073Mu
Rapamycin	MCE	HY-10219
SYBR Green qPCR Master Mix	MCE	HY-K0501-5
GSK2837808A	MCE	HY-100681
Mito-Tracker Red CMXRos	Beyotime	C1035
TMRE	Beyotime	C2001S
2-NBDG	Beyotime	ST2078
NAD/NADH kit	Beyotime	S0175
ATP kit	Solarbio	BC0300
Antibodies
anti-Mouse CD11b	BD Biosciences	550282
anti-Mouse F4/80	Bio Legend	123101
anti-Mouse Gr1	BD Biosciences	550291
anti-Mouse CD8	BD Biosciences	550281
anti-Mouse CD4	BD Biosciences	550278
anti-Mouse B220	BD Biosciences	550286
Mouse monoclonal anti-Ki67	BD Biosciences	550609
Lypd6b Antibody	Abcam	Ab201163
Phospho-PI3K Antibody	Affinity	AF3242
mTOR Antibody	Cell signaling	7C18
Phospho-mTOR (2448) Antibody	Cell signaling	D9C2
LDHA Antibody	Proteintech	19987-1-AP
Mouse monoclonal anti-β-actin	Santa Cruz	sc-47778
Percp anti-mouse CD8a	Bio Legend	100731
APC anti-mouse CD8a	Bio Legend	100712
APC anti-mouse CD4	Bio Legend	100412
FITC anti-mouse CD4	Bio Legend	100406
PE anti-mouse CD4	Bio Legend	100408
APC anti-mouse Gr1	Bio Legend	108411
PerCP/Cy5.5 anti-mouse CD11b	Bio Legend	101227
FITC anti-mouse IFN-γ	Bio Legend	505806
PE anti-mouse TNF-α	Bio Legend	506305
APC anti-mouse IL-2	Bio Legend	503809
Experimental models: cell lines
MC38	ATCC	CRL-2640
Experimental models: organisms/strains
C57BL/6	National Institute of Biological Sciences
Lypd6b−/−	National Institute of Biological Sciences
Software and algorithms
ImageJ	NIH	https://imagej.nih.gov/ij
Prism 8	GraphPad	http://www.graphpad.com/scientific-software/prism
FlowJo	FlowJo	https://www.flowjo.com
GEO Database	Open source	http://www.ncbi.nlm.nih.gov/go
